# Supplementary material for: Maternal serum C-reactive protein concentration and intra-amniotic inflammation in women with preterm prelabor rupture of membranes
Source: PLoS One. 2017 Aug 16;12(8):e0182731. doi: 10.1371/journal.pone.0182731 (PMC5558959; doi:10.1371/journal.pone.0182731)
Supplement: S1 Dataset — (XLSX) [file pone.0182731.s001.xlsx]

## Sheet: Sheet1
CRP at admission	4 groups (1= both MIAC and IAI, 2 = IAI alone, 3 = MIAC alone, 4 = without MIAC and IAI)	MIAC (N=0, Y=1)	IAI (N=0, Y=1)	rapid IL-6 (pg/mL)	PPROM to AMC (hours)	maternal age (years)	GA at sampling (days)	GA at delivery (days)	BMI	primiparity (Y=1, N=0)	corticosteroids (Y=1, N=0)	ATB (Y=1, N=0)	PPROM to AMC (hours)	PPROM to delivery (hours)	spont. delivery (Y=1, N=0)	C-sectio (Y=1, N=0)	forceps/VEX (Y=1, N=0)	weight	Apgar 5 minuta < 7	apgar 10 min < 7
40.3	1	1	1	10000	6	36	177	180	18.6	0	1	1	6	81	0	1	0	720	0	0
36.5	1	1	1	10000	9	30	192	197	26.7	1	1	1	9	124	1	0	0	720	1	0
61	1	1	1	10000	3	26	182	188	21.2	0	1	1	3	156	0	1	0	730	1	0
11.3	1	1	1	10000	4	31	178	181	18.3	1	1	1	4	109	0	1	0	760	0	0
24.3	1	1	1	10000	10	24	168	178	31.7	1	1	1	10	242	0	1	0	780	0	0
38.8	1	1	1	10000	2	31	174	181	22.9	0	1	1	2	172	1	0	0	820	0	0
80.8	1	1	1	10000	575	31	184	187	24.3	0	1	1	575	624	1	0	0	980	0	0
2.8	1	1	1	10000	2	37	192	194	25.4	0	1	1	2	40	0	1	0	1100	0	0
18.1	1	1	1	10000	3	34	225	225	23.6	0	0	1	3	5	0	1	0	1390	0	0
10.3	1	1	1	10000	3	32	207	208	30.8	0	1	1	3	26	0	1	0	1480	0	0
8.1	1	1	1	10000	12	30	210	211	28	1	1	1	12	23	1	0	0	1490	0	0
8.2	1	1	1	10000	3	25	215	219	25.3	0	1	1	3	106	1	0	0	1530	0	0
0.9	1	1	1	10000	220	38	228	229	18.5	1	1	1	220	190	1	0	0	1590	0	0
10.8	1	1	1	10000	11	25	238	239	33.3	1	1	1	11	17	1	0	0	1640	0	0
106	1	1	1	10000	51	27	220	220	27.5	1	1	1	51	55	1	0	0	1780	0	0
76	1	1	1	10000	8	38	227	230	25.3	1	1	1	8	26	1	0	0	1930	0	0
11.3	1	1	1	10000	4	21	237	237	17.7	0	1	1	4	19	1	0	0	2250	0	0
22.2	1	1	1	10000	4	37	238	238	22.4	0	1	1	4	14	1	0	0	2280	0	0
72.4	1	1	1	10000	4	37	231	233	36	0	1	1	4	29	1	0	0	2360	0	0
3.8	1	1	1	10000	14	29	257	257	19.5	1	0	1	14	25	1	0	0	3040	0	0
14.1	1	1	1	10000	4	31	252	252	29.4	0	0	0	4	5	1	0	0	3540	0	0
1	1	1	1	6060	24	35	218	221	19.2	0	1	1	24	72	0	1	0	1580	0	0
28.8	1	1	1	5336	60	35	238	238	19.3	0	1	1	60	63	1	0	0	1500	0	0
113	1	1	1	3848	4	29	207	207	18.6	0	0	1	4	5	0	1	0	1220	0	0
28	1	1	1	2356	10	39	220	221	30.4	0	1	1	10	22	1	0	0	1950	0	0
3.5	1	1	1	2282	4	31	202	210	19.3	1	1	0	4	196	1	0	0	1330	0	0
4.2	1	1	1	1964	3	22	223	225	19.5	0	1	1	3	46	1	0	0	1800	0	0
21.2	1	1	1	1774	5	27	217	220	19.2	0	1	1	5	79	1	0	0	1815	0	0
95	1	1	1	1650	1	32	257	257	21.8	1	0	1	1	5	1	0	0	2840	0	0
12.1	1	1	1	1504	24	27	194	197	21.2	1	1	1	24	73	0	1	0	1070	1	1
1.8	1	1	1	1427	6	31	236	237	19.3	1	1	1	6	54	1	0	0	1880	0	0
6.1	1	1	1	1368	5	23	242	244	16.7	0	1	1	5	44	1	0	0	2080	0	0
4.4	1	1	1	1203	3	28	254	254	27.1	0	0	1	3	6	0	1	0	2450	0	0
10.9	1	1	1	877	8	23	241	243	26.7	1	1	1	8	29	1	0	0	2810	0	0
4.5	1	1	1	831	23	31	230	235	29.1	1	1	1	23	101	1	0	0	2380	0	0
29	1	1	1	747	3	23	168	175	24.3	1	1	1	3	153	0	1	0	700	0	0
8.3	2	0	1	10000	4	31	168	187	24.3	0	1	1	4	624	1	0	0	980	0	0
21.4	2	0	1	10000	2	25	253	253	22.8	1	0	1	2	4	0	1	0	2310	0	0
0.6	2	0	1	10000	24	29	246	253	24.6	1	0	1	24	195	1	0	0	2610	0	0
2.1	2	0	1	4752	4	27	173	175	22.5	1	1	1	4	48	1	0	0	690	0	0
6.6	2	0	1	3588	5	43	247	247	23.3	0	1	1	5	180	0	1	0	1740	0	0
8.7	2	0	1	3140	2	32	245	245	19.6	0	1	1	2	6	1	0	0	2540	0	0
6	2	0	1	2941	10	29	180	196	27.9	1	1	1	10	384	1	0	0	1150	0	0
1.1	2	0	1	2589	185	37	217	218	20.6	1	1	1	185	193	1	0	0	1485	0	0
7.8	2	0	1	2289	3	34	187	190	22.8	0	1	1	3	63	1	0	0	960	0	0
2.2	2	0	1	1468	4	30	195	198	32.2	1	1	1	4	96	0	1	0	1190	0	0
2.3	2	0	1	1446	432	25	208	224	22.1	0	1	1	432	768	1	0	0	1280	0	0
3.4	2	0	1	1421	3	38	230	238	32.3	1	1	1	3	193	1	0	0	1970	0	0
6.6	2	0	1	1251	5	38	177	206	27.6	0	1	1	5	697	0	1	0	1310	0	0
6.8	2	0	1	1137	7	35	258	259	25.4	1	1	1	7	35	1	0	0	2840	0	0
4.4	2	0	1	1128	4	30	255	256	37.8	1	0	1	4	23	1	0	0	3320	0	0
3.5	2	0	1	943	4	31	202	210	19.3	1	1	1	4	196	1	0	0	1330	0	0
5.7	2	0	1	912	2	38	244	245	20.8	1	0	1	2	8	1	0	0	2180	0	0
8.6	2	0	1	864	50	27	229	232	23.9	1	1	1	50	70	1	0	0	2300	0	0
59.1	2	0	1	842	3	30	212	214	26.7	1	1	1	3	116	1	0	0	1550	0	1
16.6	2	0	1	837	9	27	244	245	20.4	0	1	1	9	42	1	0	0	2860	0	0
2.4	2	0	1	767	5	34	208	210	28.9	0	1	1	5	36	0	1	0	1340	0	0
6	3	1	0	673	7	30	238	238	28.6	1	1	1	7	11	1	0	0	2900	0	0
11	3	1	0	611	2	20	215	216	21.8	0	1	1	2	24	1	0	0	1470	0	0
4.7	3	1	0	560	20	37	249	250	27.1	0	0	1	20	85	1	0	0	1940	0	0
10.5	3	1	0	539	4	29	244	245	24.7	0	1	1	4	32	1	0	0	2450	0	0
0.7	3	1	0	484	35	25	223	228	24.1	0	1	1	35	175	1	0	0	1700	0	0
2.1	3	1	0	477	7	26	238	243	24.8	1	1	1	7	120	0	1	0	2300	0	0
0.4	3	1	0	405	10	40	228	232	24.2	1	1	1	10	112	1	0	0	1690	0	0
2.7	3	1	0	392	3	36	237	237	20.4	1	1	1	3	10	1	0	0	2180	0	0
7.4	3	1	0	359	5	42	255	256	16	0	0	1	5	31	0	1	0	2430	0	0
4.3	3	1	0	347	2	32	251	253	19.1	0	0	1	2	46	1	0	0	2570	0	0
5.8	3	1	0	341	8	36	252	254	22.4	1	1	1	8	30	1	0	0	2470	0	0
4.8	3	1	0	281	2	27	247	248	34.7	1	0	1	2	27	1	0	0	2600	0	0
0.8	3	1	0	254	2	20	255	255	20.3	1	0	1	2	7	1	0	0	3010	0	0
0.8	3	1	0	250	7	29	244	246	18.6	0	1	1	7	47	1	0	0	1980	0	0
8.2	3	1	0	250	7	29	241	242	25.5	1	1	1	7	28	1	0	0	2510	0	0
3.9	3	1	0	245	2	30	231	231	18.1	1	1	1	2	13	1	0	0	2020	0	0
3.1	3	1	0	218	4	25	256	257	22.1	1	0	1	4	68	1	0	0	2910	0	0
1.5	3	1	0	200	206	36	235	236	21.8	0	1	1	206	251	1	0	0	2840	0	0
7.8	3	1	0	193	2	38	222	223	29.1	0	1	1	2	19	1	0	0	1960	0	0
1.4	3	1	0	178	5	33	257	257	22.3	0	0	1	5	9	1	0	0	2600	0	0
13.4	3	1	0	166	2	21	254	254	20.2	1	0	1	2	4	1	0	0	2680	0	0
1.5	3	1	0	158	2	30	227	229	24.7	0	1	1	2	36	1	0	0	1910	0	0
6.9	3	1	0	156	4	24	257	257	28.2	1	0	1	4	13	1	0	0	2880	0	0
0.9	3	1	0	153	9	35	248	253	21.9	0	1	1	9	114	0	1	0	2570	0	0
3.2	3	1	0	152	4	33	248	249	24.1	0	0	1	4	31	1	0	0	3150	0	0
1.3	3	1	0	149	2	31	250	250	21.7	1	0	1	2	5	1	0	0	2700	0	0
4	3	1	0	136	23	36	231	235	22.1	1	1	1	23	74	0	0	1	1910	0	0
8.3	3	1	0	134	20	36	247	252	20.4	0	1	1	20	119	1	0	0	2420	0	0
2.2	3	1	0	131	2	34	219	222	21.6	1	1	1	2	69	1	0	0	2080	0	0
3.4	3	1	0	108	7	23	238	240	17.3	0	1	1	7	56	1	0	0	2410	0	0
2.5	3	1	0	82	4	21	245	249	19.1	0	0	1	4	72	1	0	0	2350	0	0
11.7	3	1	0	50	8	34	221	228	20.1	0	1	1	8	167	1	0	0	1760	0	0
3.9	3	1	0	50	19	28	242	244	30.9	1	1	1	19	45	0	1	0	3250	0	0
8.5	4	0	0	725	2	32	231	231	30.6	0	1	1	2	5	0	1	0	2240	0	0
3.2	4	0	0	709	12	29	243	244	20.1	1	1	1	12	28	0	1	0	1640	1	0
8.4	4	0	0	678	1	29	254	254	21.1	1	0	1	1	8	1	0	0	2440	0	0
5.9	4	0	0	663	11	25	233	236	21.3	1	1	1	11	65	1	0	0	1690	0	0
24.4	4	0	0	645	7	31	215	218	32.1	0	1	1	7	66	0	1	0	1560	0	0
6.5	4	0	0	632	6	26	252	252	21.7	1	1	1	6	17	1	0	0	2600	0	0
2.1	4	0	0	605	2	38	247	251	22.1	1	1	1	2	66	0	1	0	2580	0	0
6.6	4	0	0	585	2	31	252	258	27.1	0	0	1	2	148	0	1	0	2710	0	0
16.6	4	0	0	564	3	34	247	251	27.4	1	1	1	3	90	0	1	0	2950	0	0
5.7	4	0	0	550	6	33	252	252	22.7	0	0	1	6	9	1	0	0	2690	0	0
2.4	4	0	0	550	2	28	239	240	22.4	0	1	1	2	26	1	0	0	2740	0	0
8.4	4	0	0	542	3	30	242	243	29.7	0	1	1	3	25	1	0	0	2280	0	0
44.4	4	0	0	539	6	35	244	246	21.5	0	1	1	6	54	1	0	0	2300	0	0
7.8	4	0	0	492	10	29	256	256	29.0	1	0	1	10	20	1	0	0	2700	0	0
4.2	4	0	0	486	5	27	226	228	21.6	1	1	1	5	61	1	0	0	1800	0	0
2.7	4	0	0	470	3	23	254	256	24.9	1	0	1	3	31	1	0	0	2860	0	0
2.9	4	0	0	468	20	39	198	202	18.3	0	1	1	20	104	1	0	0	1210	0	0
4.9	4	0	0	459	4	22	211	211	22.3	1	1	1	4	16	0	1	0	920	0	0
1.9	4	0	0	454	20	34	190	207	20.3	0	1	1	20	447	0	1	0	1290	0	0
2	4	0	0	452	15	35	218	221	23.9	0	1	1	15	148	1	0	0	1840	0	0
2.8	4	0	0	441	5	25	238	239	28.1	1	1	1	5	39	1	0	0	2340	1	1
10.9	4	0	0	438	4	21	252	252	24.4	1	1	1	4	17	1	0	0	1750	0	0
27.1	4	0	0	432	3	28	247	247	23	1	1	1	3	11	1	0	0	2540	0	0
8.5	4	0	0	432	4	37	256	257	24.4	0	0	1	4	59	1	0	0	3250	0	0
9.3	4	0	0	425	7	28	247	248	16.6	1	0	1	7	14	1	0	0	2200	0	0
10.7	4	0	0	418	23	34	231	232	26.4	0	1	1	23	29	0	1	0	2000	0	0
11.4	4	0	0	406	4	26	230	230	20.6	1	1	1	4	11	1	0	0	1450	0	0
27	4	0	0	405	2	34	231	232	39	0	1	1	2	20	1	0	0	2120	0	0
47	4	0	0	405	35	38	241	242	22.4	0	1	1	35	101	1	0	0	2470	0	0
9.3	4	0	0	402	3	30	252	253	27.3	0	1	1	3	50	1	0	0	2170	0	0
4.3	4	0	0	391	8	40	235	237	18.9	1	1	1	8	44	0	1	0	2230	0	0
1.2	4	0	0	390	7	34	234	234	18.5	1	1	1	7	17	0	1	0	1750	0	0
7.8	4	0	0	387	5	37	231	232	30.9	0	1	1	5	27	0	1	0	2430	0	0
1.8	4	0	0	385	2	34	256	257	25.9	0	0	1	2	6	1	0	0	3200	0	0
1.6	4	0	0	378	4	32	220	223	23.6	1	1	1	4	60	1	0	0	1570	0	0
5.2	4	0	0	371	5	27	247	248	23.4	1	1	1	5	44	1	0	0	2850	0	0
8.1	4	0	0	368	3	32	247	251	21.4	1	1	1	3	105	1	0	0	2660	0	0
2.8	4	0	0	366	600	25	215	224	22.1	0	1	1	600	768	1	0	0	1280	0	0
0.9	4	0	0	357	4	29	219	232	21.6	0	1	1	4	333	1	0	0	2260	0	0
5.3	4	0	0	355	11	31	246	248	22.3	1	1	1	11	100	1	0	0	2610	0	0
6.8	4	0	0	351	4	29	242	243	20.2	1	1	1	4	32	1	0	0	2110	0	0
11.8	4	0	0	351	6	29	255	256	25.6	0	0	1	6	15	1	0	0	2900	0	0
10.4	4	0	0	350	10	33	211	213	22.2	1	1	1	10	55	0	1	0	1300	1	0
11.5	4	0	0	350	9	36	239	239	28	1	1	1	9	19	1	0	0	1790	0	0
0.6	4	0	0	345	2	37	219	219	30.5	1	1	1	2	5	1	0	0	1460	0	0
6.7	4	0	0	332	14	30	253	255	27.7	1	0	1	14	47	1	0	0	3480	0	0
1.7	4	0	0	328	6	31	251	251	19.2	0	1	1	6	10	1	0	0	2110	0	0
6.4	4	0	0	318	4	27	234	235	24.6	1	1	1	4	22	1	0	0	2490	0	0
5.1	4	0	0	309	14	29	241	241	22.2	1	1	1	14	28	1	0	0	2410	0	0
7.9	4	0	0	307	2	32	250	250	20.4	0	1	1	2	12	0	1	0	2980	0	0
11.8	4	0	0	305	3	24	248	248	22.5	1	1	1	3	5	1	0	0	2610	0	0
2.2	4	0	0	302	22	31	248	249	23.9	1	1	1	22	33	0	1	0	2500	0	0
5	4	0	0	301	84	29	168	168	23.5	1	1	1	84	80	0	1	0	710	1	1
1.8	4	0	0	300	2	29	221	225	31.8	0	1	1	2	64	1	0	0	1950	0	0
2.7	4	0	0	299	5	27	255	255	18.8	1	0	1	5	29	1	0	0	2630	0	0
1.2	4	0	0	298	8	22	236	237	22.4	1	1	1	8	15	1	0	0	2610	0	0
4.7	4	0	0	297	2	36	225	228	24.2	0	1	1	2	53	1	0	0	1930	0	0
1.3	4	0	0	296	7	26	256	259	22.7	1	0	1	7	55	1	0	0	2000	0	0
7.6	4	0	0	295	168	31	168	187	24.3	0	1	1	168	624	1	0	0	980	0	0
4.7	4	0	0	288	3	43	235	238	20.1	0	1	1	3	71	1	0	0	1970	0	0
7.7	4	0	0	283	10	37	210	214	30.5	0	1	1	10	135	0	1	0	1075	0	0
3.3	4	0	0	280	2	31	257	257	20.3	1	0	1	2	9	1	0	0	3210	0	0
6.2	4	0	0	278	2	36	249	250	25.4	1	1	1	2	18	1	0	0	2480	0	0
4	4	0	0	278	4	29	257	257	19	1	0	1	4	20	0	0	1	2790	0	0
1.2	4	0	0	277	3	29	256	257	18.58	0	1	1	3	31	1	0	0	2230	0	0
1.8	4	0	0	274	3	33	220	224	29.7	0	1	1	3	101	1	0	0	1770	0	0
4.8	4	0	0	270	12	27	242	244	29.1	0	1	1	12	30	1	0	0	2650	0	0
18.4	4	0	0	269	5	36	245	245	29.7	0	0	0	5	6	1	0	0	2300	0	0
11.3	4	0	0	268	2	34	212	230	35.8	1	1	1	2	432	1	0	0	1970	0	0
1.2	4	0	0	268	5	34	237	238	20.6	1	1	1	5	36	1	0	0	2300	0	0
43.5	4	0	0	265	2	27	214	215	28.5	1	1	1	2	11	1	0	0	1380	0	0
4.1	4	0	0	265	4	33	227	229	20.5	0	1	1	4	41	1	0	0	1970	0	0
2.9	4	0	0	263	5	29	238	238	20.6	0	1	1	5	15	1	0	0	1960	0	0
6.8	4	0	0	263	2	30	255	255	25.9	1	0	1	2	5	1	0	0	3280	0	0
10.6	4	0	0	262	3	25	255	255	25.2	1	0	1	3	6	1	0	0	2290	0	0
9.5	4	0	0	261	8	26	233	234	21.97	0	1	1	8	37	1	0	0	2310	0	0
10.7	4	0	0	244	2	35	247	247	20.6	1	0	1	2	13	1	0	0	2200	0	0
2.1	4	0	0	244	3	28	241	241	23.8	1	1	1	3	8	1	0	0	2650	0	0
2.4	4	0	0	244	4	32	251	251	21.5	0	0	1	4	13	1	0	0	2970	0	0
13.5	4	0	0	236	3	29	256	257	27.8	1	0	1	3	26	1	0	0	3300	0	0
0.1	4	0	0	235	3	38	237	242	20.9	0	1	1	3	88	1	0	0	2290	0	0
12.6	4	0	0	233	8	33	249	249	26.2	0	1	1	8	9	0	1	0	2310	0	0
7.8	4	0	0	232	4	34	235	240	24.8	0	1	1	4	127	0	1	0	1950	0	0
3.5	4	0	0	231	3	37	195	207	28.6	0	0	1	3	301	0	1	0	1185	0	0
2.1	4	0	0	231	5	28	250	250	21.7	1	1	1	5	13	1	0	0	2720	0	0
8.7	4	0	0	230	7	30	203	204	25.9	0	1	1	7	29	1	0	0	1400	0	0
6.0	4	0	0	230	14	36	234	240	21.7	0	1	1	14	143	1	0	0	2460	0	0
1.6	4	0	0	227	8	36	235	236	23.9	0	1	1	8	18	1	0	0	3110	0	0
1.1	4	0	0	225	12	21	181	195	20.5	1	1	1	12	336	1	0	0	980	0	0
3	4	0	0	224	2	27	248	248	26.5	0	0	1	2	7	0	1	0	2090	0	0
2.8	4	0	0	223	3	30	233	233	22.3	1	1	1	3	18	1	0	0	2160	0	0
2.8	4	0	0	221	2	33	244	245	19.5	1	0	1	2	31	0	1	0	2420	0	0
2	4	0	0	220	2	32	232	233	18.3	0	1	1	2	22	1	0	0	1640	0	0
1.1	4	0	0	219	12	21	181	197	20.5	1	1	1	12	408	1	0	0	1000	0	0
1	4	0	0	219	2	30	218	218	20.3	0	1	1	2	5	1	0	0	1890	0	0
6.3	4	0	0	218	3	38	188	191	24.1	0	1	1	3	34	1	0	0	700	0	0
13.2	4	0	0	210	17	35	204	207	22.4	0	1	1	17	63	0	1	0	1110	0	0
1.6	4	0	0	210	62	34	243	245	20.3	1	0	1	62	62	1	0	0	2370	0	0
4.6	4	0	0	207	1	29	233	234	19.9	0	1	1	1	18	1	0	0	1830	0	0
3.8	4	0	0	203	356	34	206	207	20.3	0	1	1	356	447	0	1	0	1290	0	0
16.9	4	0	0	200	4	30	244	245	22	1	1	0	4	10	1	0	0	2280	0	0
6.5	4	0	0	196	5	31	246	247	29.2	1	1	1	5	26	1	0	0	2170	0	0
19.1	4	0	0	194	7	29	225	229	31.9	1	1	1	7	60	1	0	0	1720	0	0
10.2	4	0	0	192	25	28	211	214	31.5	1	1	1	25	75	0	1	0	1650	0	0
10.6	4	0	0	187	16	31	244	249	29.1	0	1	1	16	128	1	0	0	2430	0	0
4.2	4	0	0	186	4	36	249	249	30.4	1	1	1	4	34	0	1	0	2260	0	0
3.1	4	0	0	185	56	38	236	240	23.6	1	1	1	56	105	1	0	0	2220	0	0
1.5	4	0	0	185	3	37	257	259	21.8	0	0	1	3	52	1	0	0	2720	0	0
24	4	0	0	180	4	30	207	207	34.1	1	1	1	4	9	0	1	0	1430	0	0
10.1	4	0	0	180	7	34	245	251	35.9	0	1	0	7	120	0	1	0	2970	0	0
2.1	4	0	0	178	10	37	215	216	24.3	0	1	1	10	27	1	0	0	1460	0	0
6	4	0	0	177	336	29	194	196	27.9	1	1	1	336	384	1	0	0	1150	0	0
4.9	4	0	0	177	188	34	197	207	20.3	0	1	1	188	447	0	1	0	1290	0	0
6.6	4	0	0	176	6	43	241	247	23.3	0	1	0	6	180	0	1	0	1740	0	0
6.1	4	0	0	172	2	30	237	238	39	1	1	1	2	33	0	1	0	2390	0	0
4.1	4	0	0	172	4	36	248	250	27.1	1	1	1	4	32	1	0	0	2640	0	0
6.9	4	0	0	168	4	28	239	243	30.2	1	1	1	4	104	1	0	0	2830	0	0
1.1	4	0	0	166	2	30	234	235	22.2	0	1	1	2	19	1	0	0	2390	0	0
3.4	4	0	0	164	3	29	237	243	22	1	1	1	3	173	1	0	0	2910	0	0
5.4	4	0	0	163	5	29	218	220	29	1	1	1	5	80	1	0	0	1630	0	0
2	4	0	0	161	3	33	228	231	20.4	1	1	1	3	77	1	0	0	2270	0	0
2	4	0	0	160	4	27	240	240	26.7	1	1	0	4	7	1	0	0	2160	0	0
11.7	4	0	0	160	1	40	238	243	34.6	0	1	1	1	130	1	0	0	2300	0	0
1.5	4	0	0	159	14	36	225	236	21.8	0	1	1	14	251	1	0	0	2840	0	0
3.8	4	0	0	158	4	24	242	248	19.5	1	1	1	4	49	1	0	0	2450	0	0
4.8	4	0	0	156	4	29	246	246	18.4	1	0	1	4	6	1	0	0	2580	0	0
6.4	4	0	0	155	12	23	243	244	20.6	0	1	1	12	24	1	0	0	3550	0	0
10.8	4	0	0	154	10	32	228	229	26.5	1	1	1	10	34	0	1	0	1740	0	0
6	4	0	0	152	178	29	187	196	27.9	1	1	1	178	384	1	0	0	1150	0	0
8.3	4	0	0	148	2	30	207	212	19.6	0	1	1	2	129	0	1	0	1620	0	0
3.8	4	0	0	144	1	35	236	237	20.2	1	1	1	1	19	1	0	0	2090	0	0
2.4	4	0	0	138	4	30	256	258	21.8	1	0	1	4	41	0	1	0	2890	0	0
4.6	4	0	0	138	2	29	256	256	22	1	0	1	2	4	0	1	0	3390	0	0
5.8	4	0	0	136	8	21	219	219	21.1	0	1	1	8	14	1	0	0	1600	0	0
4.8	4	0	0	136	6	27	244	244	22.1	1	1	1	6	14	0	1	0	2430	0	0
4.4	4	0	0	136	1	29	242	242	18.7	0	1	1	1	5	1	0	0	2670	0	0
6.6	4	0	0	134	3	22	257	257	23.1	0	0	1	3	8	1	0	0	2160	0	0
3.5	4	0	0	133	3	31	250	253	19.6	1	1	1	3	74	1	0	0	2700	0	0
3.7	4	0	0	127	2	35	250	250	27.7	1	0	1	2	6	1	0	0	2820	0	0
4.1	4	0	0	122	10	31	233	238	24.24	0	1	1	10	120	1	0	0	2900	0	0
4.9	4	0	0	121	4	32	256	256	26.3	0	0	1	4	12	1	0	0	3670	0	0
6.6	4	0	0	118	5	38	184	206	27.6	0	1	1	5	697	0	1	0	1310	0	0
3.2	4	0	0	118	4	21	247	248	18.8	1	1	1	4	23	1	0	0	2180	0	0
4.6	4	0	0	117	2	31	249	251	21.2	0	1	1	2	16	1	0	0	2790	0	0
4	4	0	0	114	5	36	245	246	35.1	1	1	1	5	22	0	0	1	2270	0	0
1.9	4	0	0	114	8	32	220	228	17.7	1	1	1	8	400	1	0	0	2320	0	0
7.6	4	0	0	112	68	36	234	238	24.9	0	1	1	68	95	1	0	0	2190	0	0
0.3	4	0	0	111	13	27	228	229	16.9	0	1	1	13	39	1	0	0	1950	0	0
6.5	4	0	0	110	8	33	251	251	40	0	1	1	8	22	1	0	0	2880	0	0
0.9	4	0	0	107	5	38	221	229	18.5	1	1	1	5	190	1	0	0	1590	0	0
2.9	4	0	0	107	72	30	230	236	23.9	0	1	1	72	248	1	0	0	2800	0	0
2.1	4	0	0	106	1	40	250	250	21.1	0	1	1	1	6	1	0	0	2800	0	0
5.4	4	0	0	105	9	32	222	233	31.2	0	1	1	9	190	0	1	0	1910	0	0
7.8	4	0	0	100	2	24	235	235	23.2	1	1	1	2	17	0	1	0	2190	0	0
6.8	4	0	0	96	1	36	207	209	35.5	0	1	1	1	35	0	1	0	1090	0	0
2.2	4	0	0	92	75	30	245	256	21.2	0	1	1	75	264	0	1	0	2550	0	0
2.4	4	0	0	89	6	40	213	215	20.9	0	1	1	6	47	0	1	0	1330	0	0
6.8	4	0	0	85	8	31	248	248	21.6	0	1	1	8	19	1	0	0	2580	0	0
15	4	0	0	58	25	38	242	244	37.1	0	1	1	25	52	1	0	0	1760	0	0
2.0	4	0	0	52	22	30	234	234	21.9	1	1	1	22	28	1	0	0	1910	0	0
3.3	4	0	0	51	27	36	213	215	25.1	0	1	1	27	45	1	0	0	1240	0	0
1.1	4	0	0	50	17	37	210	218	20.6	1	1	1	17	193	1	0	0	1485	0	0
3.1	4	0	0	50	48	38	218	227	31.1	0	1	1	48	367	1	0	0	1700	0	0
22.9	4	0	0	50	2	25	219	226	25	1	1	1	2	178	1	0	0	1790	0	0
6.6	4	0	0	50	5	36	222	224	21.1	0	1	1	5	53	0	1	0	1830	0	0
6.7	4	0	0	50	5	38	235	237	24.8	0	1	1	5	47	0	1	0	1900	0	0
5.4	4	0	0	50	177	32	229	233	31.2	0	1	1	177	286	0	1	0	1910	0	0
1.2	4	0	0	50	6	34	219	225	18.9	0	1	1	6	176	1	0	0	1950	0	0
4.4	4	0	0	50	3	33	229	229	20.2	1	1	1	3	5	0	1	0	2080	0	0
10.1	4	0	0	50	5	39	221	228	23.8	0	1	1	5	166	0	1	0	2160	0	0
5.9	4	0	0	50	4	38	242	242	21.9	1	1	1	4	19	0	1	0	2180	0	0
4.7	4	0	0	50	5	32	245	245	21.8	1	1	1	5	16	1	0	0	2200	0	0
8.4	4	0	0	50	8	31	234	235	21.8	0	1	1	8	41	1	0	0	2200	0	0
1.4	4	0	0	50	8	27	221	226	20.1	0	1	1	8	122	0	1	0	2210	0	0
8.1	4	0	0	50	4	26	242	247	32.4	0	1	1	4	131	0	1	0	2240	0	0
2.8	4	0	0	50	5	42	247	247	20	0	1	1	5	15	0	1	0	2320	0	0
3.9	4	0	0	50	8	23	249	252	19	1	1	1	8	74	1	0	0	2430	0	0
2	4	0	0	50	4	25	242	243	24.0	1	1	1	4	27	1	0	0	2440	0	0
1.5	4	0	0	50	5	34	253	254	19.4	0	0	1	5	26	1	0	0	2450	0	0
8.3	4	0	0	50	13	18	238	240	20.2	1	1	1	13	49	1	0	0	2450	0	0
5.3	4	0	0	50	17	38	235	239	57.1	1	1	1	17	98	0	1	0	2460	0	0
7	4	0	0	50	17	28	256	258	17.1	1	0	1	17	42	1	0	0	2500	0	0
5	4	0	0	50	10	31	242	243	20.6	0	1	1	10	21	1	0	0	2510	0	0
12	4	0	0	50	2	32	241	244	19.5	0	1	1	2	71	1	0	0	2550	0	0
0.5	4	0	0	50	4	27	252	252	21.8	1	0	1	4	8	1	0	0	2580	0	0
7.9	4	0	0	50	12	35	257	260	26.8	1	0	1	12	78	0	1	0	2580	0	0
2.3	4	0	0	50	23	27	255	257	22.9	1	0	1	23	49	1	0	0	2590	0	0
1.6	4	0	0	50	32	36	241	247	23.5	1	1	1	32	130	1	0	0	2600	0	0
6	4	0	0	50	3	25	246	252	20.2	0	1	1	3	127	1	0	0	2700	0	0
7.2	4	0	0	50	7	24	255	255	21.9	1	0	1	7	20	1	0	0	2730	0	0
2.5	4	0	0	50	3	27	257	257	25.8	0	0	1	3	13	1	0	0	2740	0	0
5.5	4	0	0	50	4	35	245	247	29.3	0	1	1	4	48	1	0	0	2790	0	0
4.3	4	0	0	50	7	27	247	247	24.6	1	0	1	7	12	1	0	0	2840	0	0
4.1	4	0	0	50	10	31	233	238	24.24	0	1	1	10	120	1	0	0	2900	0	0
1.7	4	0	0	50	3	39	256	257	21	0	0	1	3	27	0	1	0	2920	0	0
3.9	4	0	0	50	5	22	255	256	29.8	1	0	1	5	27	1	0	0	3400	0	0
1.4	4	0	0	36	3	43	254	254	28.6	1	0	1	3	6	0	1	0	2710	0	0
